# Supplementary material for: Effects of Cu(i) contents on the voltammetric behavior and electrodeposition mechanism of bimetallic composite ionic liquids
Source: Royal Society of Chemistry journal article supplement (doi:10.1039/d2nj02556f), 2022-01-01
Supplement: d2nj02556f1.pdf [file d2nj02556f1.pdf]

## Supporting information

### Effects of Cu(I) contents on voltammetric behavior and electrodeposition mechanism of bimetallic composite ionic liquids

Ping Ouyang<sup>a</sup>, Rui Zhang<sup>a</sup>, Jian Zhou<sup>a</sup>, Haiyan Liu<sup>a</sup>, Zhichang Liu<sup>a</sup>,  
Chunming Xu<sup>a</sup>, Shaojuan Zeng<sup>b</sup>, Qian Su<sup>b</sup>, Xiangping Zhang<sup>b</sup>, Xianghai  
Meng<sup>a</sup>, \*

<sup>a</sup> State Key Laboratory of Heavy Oil Processing, China University of Petroleum, Beijing, 102249, China

<sup>b</sup> State Key Laboratory of Multiphase Complex System, Beijing Key Laboratory of Ionic Liquids Clean Process, Institute of  
Process Engineering, Chinese Academy of Sciences, Beijing, 100190, China

[Corresponding author: mengxh@cup.edu.cn](mailto:mengxh@cup.edu.cn)

Contents:

Table S1 Actual molar coefficient of bimetallic composite ILs.

Table S2 Variation of copper and aluminium contents with potential in electrodeposits from Et<sub>3</sub>NHCl-1.54AlCl<sub>3</sub>-0.010CuCl on silver electrode.

Table S3 Variation of copper and aluminium contents with potential in electrodeposits from Et<sub>3</sub>NHCl-1.54AlCl<sub>3</sub>-0.23CuCl on silver electrode.

Table S4 Contents of copper and aluminium in electrodeposits from Et<sub>3</sub>NHCl-1.54AlCl<sub>3</sub>-xCuCl ILs on silver electrode at the potentials of -1.8 V vs. Pt.

Table S5 Contents of copper and aluminium in electrodeposits from Et<sub>3</sub>NHCl-1.54AlCl<sub>3</sub>-xCuCl ILs on silver electrode at the potentials of -2.6 V vs. Pt.

Fig. S1 The color change of wet potassium iodide starch paper during the electrodeposition of (a) Et<sub>3</sub>NHCl-1.54AlCl<sub>3</sub>-0.010CuCl IL and (b) Et<sub>3</sub>NHCl-1.54AlCl<sub>3</sub>-0.23CuCl IL.

**Table S1** Actual molar coefficient of bimetallic composite ILs.

| Theoretical molar ratio                              | Contents of Al (wt%) | Contents of Cu (wt%) | Molar coefficient    |                   |       |
|------------------------------------------------------|----------------------|----------------------|----------------------|-------------------|-------|
|                                                      |                      |                      | Et <sub>3</sub> NHCl | AlCl <sub>3</sub> | CuCl  |
| Et <sub>3</sub> NHCl-1.8AlCl <sub>3</sub>            | 11.96                | 0                    | 1                    | 1.49              | 0     |
| Et <sub>3</sub> NHCl-1.8AlCl <sub>3</sub> -0.005CuCl | 12.01                | 0.10                 | 1                    | 1.51              | 0.005 |
| Et <sub>3</sub> NHCl-1.8AlCl <sub>3</sub> -0.01CuCl  | 11.68                | 0.19                 | 1                    | 1.42              | 0.010 |
| Et <sub>3</sub> NHCl-1.8AlCl <sub>3</sub> -0.02CuCl  | 11.67                | 0.36                 | 1                    | 1.43              | 0.020 |
| Et <sub>3</sub> NHCl-1.8AlCl <sub>3</sub> -0.05CuCl  | 12.35                | 0.60                 | 1                    | 1.66              | 0.034 |
| Et <sub>3</sub> NHCl-1.8AlCl <sub>3</sub> -0.1CuCl   | 12.25                | 1.28                 | 1                    | 1.67              | 0.074 |
| Et <sub>3</sub> NHCl-1.8AlCl <sub>3</sub> -0.2CuCl   | 11.70                | 2.23                 | 1                    | 1.54              | 0.11  |
| Et <sub>3</sub> NHCl-1.8AlCl <sub>3</sub> -0.5CuCl   | 11.46                | 3.95                 | 1                    | 1.57              | 0.23  |
| Average                                              | -                    | -                    | -                    | 1.54              | -     |

**Table S2** Variation of copper and aluminium contents with potential in electrodeposits from Et<sub>3</sub>NHCl-1.54AlCl<sub>3</sub>-0.010CuCl on silver electrode.

| Electrodeposition potential (V) | Copper (wt%) | Aluminium (wt%) | Other elements (wt%) |
|---------------------------------|--------------|-----------------|----------------------|
| -1.5                            | 89.48        | 2.89            | 7.63                 |
| -1.8                            | 70.97        | 1.17            | 27.86                |
| -2.6                            | 10.22        | 40.75           | 49.03                |

**Table S3** Variation of copper and aluminium contents with potential in electrodeposits from Et<sub>3</sub>NHCl-1.54AlCl<sub>3</sub>-0.23CuCl on silver electrode.

| Electrodeposition potential (V) | Copper (wt%) | Aluminium (wt%) | Other elements (wt%) |
|---------------------------------|--------------|-----------------|----------------------|
| -1.2                            | 94.25        | 0.48            | 5.27                 |
| -1.8                            | 98.58        | 0.35            | 1.07                 |
| -2.6                            | 96.40        | 0.30            | 3.30                 |

**Table S4** Contents of copper and aluminium in electrodeposits from Et<sub>3</sub>NHCl-1.54AlCl<sub>3</sub>-xCuCl ILs on silver electrode at the potentials of -1.8 V vs. Pt. (Corresponding to Fig.6).

| Actual molar ratio                                    | Copper (wt%) | Aluminium (wt%) | Other elements (C, O, Cl, Ag) (wt%) |
|-------------------------------------------------------|--------------|-----------------|-------------------------------------|
| Et <sub>3</sub> NHCl-1.54AlCl <sub>3</sub> -0.005CuCl | 54.99        | 4.53            | 40.48                               |
| Et <sub>3</sub> NHCl-1.54AlCl <sub>3</sub> -0.010CuCl | 70.97        | 1.17            | 27.86                               |
| Et <sub>3</sub> NHCl-1.54AlCl <sub>3</sub> -0.020CuCl | 69.27        | 7.70            | 23.03                               |
| Et <sub>3</sub> NHCl-1.54AlCl <sub>3</sub> -0.034CuCl | 87.89        | 4.75            | 7.36                                |
| Et <sub>3</sub> NHCl-1.54AlCl <sub>3</sub> -0.074CuCl | 90.62        | 1.59            | 7.79                                |
| Et <sub>3</sub> NHCl-1.54AlCl <sub>3</sub> -0.11CuCl  | 98.58        | 0.35            | 1.07                                |
| Et <sub>3</sub> NHCl-1.54AlCl <sub>3</sub> -0.23CuCl  | 97.02        | 0.15            | 2.83                                |

**Table S5** Contents of copper and aluminium in electrodeposits from Et<sub>3</sub>NHCl-1.54AlCl<sub>3</sub>-xCuCl ILs on silver electrode at the potentials of -2.6 V vs. Pt. (Corresponding to Fig.6).

| Actual molar ratio                                          | Copper (wt%) | Aluminium (wt%) | Other elements<br>(C, O, Cl, Ag) (wt%) |
|-------------------------------------------------------------|--------------|-----------------|----------------------------------------|
| $\text{Et}_3\text{NHCl}-1.54\text{AlCl}_3-0.005\text{CuCl}$ | 1.37         | 34.09           | 64.54                                  |
| $\text{Et}_3\text{NHCl}-1.54\text{AlCl}_3-0.010\text{CuCl}$ | 10.22        | 40.75           | 49.03                                  |
| $\text{Et}_3\text{NHCl}-1.54\text{AlCl}_3-0.020\text{CuCl}$ | 18.82        | 34.28           | 46.90                                  |
| $\text{Et}_3\text{NHCl}-1.54\text{AlCl}_3-0.034\text{CuCl}$ | 19.87        | 33.43           | 46.70                                  |
| $\text{Et}_3\text{NHCl}-1.54\text{AlCl}_3-0.074\text{CuCl}$ | 41.21        | 9.67            | 49.12                                  |
| $\text{Et}_3\text{NHCl}-1.54\text{AlCl}_3-0.11\text{CuCl}$  | 96.40        | 0.30            | 3.30                                   |
| $\text{Et}_3\text{NHCl}-1.54\text{AlCl}_3-0.23\text{CuCl}$  | 94.21        | 0.31            | 5.48                                   |

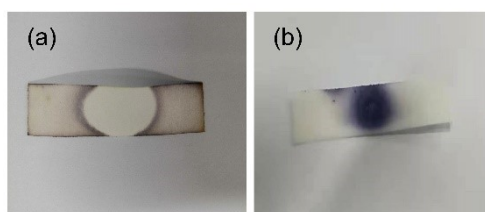

**Fig. S1** The color change of wet potassium iodide starch paper during the electrodeposition of (a)  $\text{Et}_3\text{NHCl}-1.54\text{AlCl}_3-0.010\text{CuCl}$  IL and (b)  $\text{Et}_3\text{NHCl}-1.54\text{AlCl}_3-0.23\text{CuCl}$  IL.
